# Supplementary material for: Interpreting the MicroRNA-15/107 family: interaction identification by combining network based and experiment supported approach
Source: Springer Nature journal article supplement (doi:10.1186/s12881-019-0824-9), 2019-05-31
Supplement: MOESM3 [file 16763832]

Additional file 3. Significantly involved KEGG pathways regulated by miR-15/107 family.

| KEGG pathway                                                            | p-value     | Involved target genes | Involved miRNAs |
|-------------------------------------------------------------------------|-------------|-----------------------|-----------------|
| Fatty acid biosynthesis                                                 | <1E-325     | 5                     | 6               |
| Viral carcinogenesis                                                    | <1E-325     | 89                    | 6               |
| Fatty acid metabolism                                                   | <1E-325     | 21                    | 7               |
| Adherens junction                                                       | <1E-325     | 41                    | 8               |
| Proteoglycans in cancer                                                 | <1E-325     | 96                    | 8               |
| Hippo signaling pathway                                                 | 1.11E-16    | 53                    | 6               |
| Hepatitis B                                                             | 1.11E-16    | 67                    | 8               |
| p53 signaling pathway                                                   | 5.61E-12    | 39                    | 8               |
| Fatty acid degradation                                                  | 7.99E-12    | 15                    | 5               |
| TGF-beta signaling pathway                                              | 2.12E-11    | 33                    | 6               |
| Lysine degradation                                                      | 2.39E-11    | 25                    | 7               |
| Cell cycle                                                              | 2.51E-11    | 65                    | 7               |
| Protein processing in endoplasmic reticulum                             | 5.77E-11    | 83                    | 8               |
| Prostate cancer                                                         | 2.32E-10    | 49                    | 8               |
| Oocyte meiosis                                                          | 2.04E-09    | 41                    | 4               |
| Glioma                                                                  | 2.84E-09    | 34                    | 5               |
| Chronic myeloid leukemia                                                | 9.47E-09    | 39                    | 6               |
| Fatty acid elongation                                                   | 1.37E-07    | 8                     | 5               |
| Pathways in cancer                                                      | 2.00E-07    | 141                   | 5               |
| Pancreatic cancer                                                       | 3.15E-06    | 37                    | 5               |
| Colorectal cancer                                                       | 7.36E-06    | 33                    | 5               |
| Melanoma                                                                | 1.27E-05    | 26                    | 4               |
| Prion diseases                                                          | 1.94E-05    | 10                    | 1               |
| Epstein-Barr virus infection                                            | 2.97E-05    | 72                    | 5               |
| Signaling pathways regulating pluripotency of stem cells                | 0.000109542 | 52                    | 3               |
| Progesterone-mediated oocyte maturation                                 | 0.000180975 | 33                    | 4               |
| Bladder cancer                                                          | 0.000334588 | 24                    | 6               |
| Renal cell carcinoma                                                    | 0.000551682 | 30                    | 2               |
| Small cell lung cancer                                                  | 0.000558223 | 42                    | 4               |
| Non-small cell lung cancer                                              | 0.001344407 | 24                    | 4               |
| Glycosaminoglycan biosynthesis - chondroitin sulfate / dermatan sulfate | 0.001670125 | 7                     | 4               |
| FoxO signaling pathway                                                  | 0.001704236 | 37                    | 2               |
| Bacterial invasion of epithelial cells                                  | 0.002760089 | 25                    | 2               |
| Ubiquitin mediated proteolysis                                          | 0.002970495 | 45                    | 3               |
| Endometrial cancer                                                      | 0.006452572 | 22                    | 3               |
| Shigellosis                                                             | 0.01774476  | 26                    | 2               |
| Thyroid hormone signaling pathway                                       | 0.02261482  | 30                    | 2               |
| Dorso-ventral axis formation                                            | 0.02635076  | 16                    | 3               |
| HTLV-I infection                                                        | 0.03037772  | 44                    | 1               |
