# Supplementary material for: Interpreting the MicroRNA-15/107 family: interaction identification by combining network based and experiment supported approach
Source: Springer Nature journal article supplement (doi:10.1186/s12881-019-0824-9), 2019-05-31
Supplement: MOESM4 [file 16763832]

Additional file 4. List of miR-15/107 targeted genes within cell cycle pathway

| Gene symbol | Full name                               | Target miRNA                                                                    | Validation methods    |
|-------------|-----------------------------------------|---------------------------------------------------------------------------------|-----------------------|
| CCNA2       | cyclin A2                               | miR-15a-5p, miR-15b-5p, miR-103a-3p, miR-107, miR-195-5p                        | HITS-CLIP             |
| CCNB1       | cyclin B1                               | miR-103a-3p, miR-107                                                            | HITS-CLIP             |
| CCND3       | cyclin D3                               | miR-15a-5p, miR-15b-5p, miR-16-5p, miR-195-5p                                   | Multiple              |
| CCNE1       | cyclin E1                               | miR-15a-5p, miR-15b-5p, miR-16-5p, miR-103a-3p, miR-107, miR-195-5p, miR-424-5p | Multiple              |
| CDC7        | cell division cycle 7                   | miR-15a-5p, miR-15b-5p, miR-16-5p, miR-195-5p                                   | Multiple<br>HITS-CLIP |
| CDC14B      | cell division cycle 14B                 | miR-15a-5p                                                                      | HITS-CLIP             |
| CDC20       | cell division cycle 20                  | miR-16-5p                                                                       | Multiple              |
| CDC25A      | cell division cycle 25A                 | miR-15a-5p, miR-15b-5p, miR-16-5p, miR-103a-3p, miR-107, miR-195-5p, miR-424-5p | Multiple              |
| CDC25B      | cell division cycle 25B                 | miR-15a-5p, miR-424-5p                                                          | HITS-CLIP<br>Multiple |
| CDK1        | cyclin dependent kinase 1               | miR-103a-3p, miR-107                                                            | PAR-CLIP              |
| CDK6        | cyclin dependent kinase 6               | miR-15a-5p, miR-15b-5p, miR-16-5p, miR-103a-3p, miR-107, miR-195-5p, miR-424-5p | Multiple              |
| CDKN1A      | cyclin dependent kinase inhibitor 1A    | miR-15a-5p, miR-15b-5p, miR-16-5p, miR-103a-3p, miR-107, miR-195-5p, miR-424-5p | Multiple              |
| CDKN2A      | cyclin dependent kinase inhibitor 2A    | miR-16-5p                                                                       | Multiple              |
| TGFB1       | transforming growth factor beta 1       | miR-103a-3p, miR-107                                                            | HITS-CLIP             |
| SMAD3       | SMAD family member 3                    | miR-16-5p, miR-424-5p                                                           | HITS-CLIP<br>Multiple |
| SMAD4       | SMAD family member 4                    | miR-103a-3p, miR-107                                                            | HITS-CLIP             |
| SMC3        | structural maintenance of chromosomes 3 | miR-15a-5p, miR-15b-5p, miR-16-5p, miR-195-5p, miR-424-5p                       | PAR-CLIP              |
| RBL1        | RB transcriptional corepressor like 1   | miR-15a-5p, miR-15b-5p, miR-16-5p, miR-103a-3p, miR-107, miR-195-5p, miR-424-5p | PAR-CLIP<br>Multiple  |
| CREBBP      | CREB binding protein                    | miR-15a-5p, miR-15b-5p, miR-195-5p, miR-16-5p, miR-103a-3p, miR-107             | HITS-CLIP<br>Multiple |
| STAG2       | stromal antigen 2                       | miR-424-5p                                                                      | Multiple              |
| GSK3B       | glycogen synthase kinase 3 beta         | miR-103a-3p, miR-107, miR-424-5p                                                | Multiple<br>PAR-CLIP  |

|         |                                                                              |                                                                      |           |
|---------|------------------------------------------------------------------------------|----------------------------------------------------------------------|-----------|
| E2F3    | E2F transcription factor 3                                                   | miR-15a-5p, miR-15b-5p, miR-16-5p, miR-195-5p, miR-424-5p            | Multiple  |
|         |                                                                              | miR-103a-3p, miR-107                                                 | HITS-CLIP |
| E2F5    | E2F transcription factor 5                                                   | miR-15a-5p, miR-15b-5p, miR-16-5p                                    | Multiple  |
| TFDP1   | transcription factor Dp-1                                                    | miR-16-5p                                                            | HITS-CLIP |
| MDM2    | MDM2 proto-oncogene                                                          | miR-15a-5p, miR-16-5p, miR-424-5p                                    | Multiple  |
|         |                                                                              | miR-15b-5p, miR-103a-3p, miR-107, miR-195-5p                         | HITS-CLIP |
| PRKDC   | protein kinase, DNA-activated, catalytic subunit                             | miR-15a-5p, miR-15b-5p, miR-16-5p, miR-195-5p                        | Multiple  |
|         |                                                                              | miR-424-5p                                                           | HITS-CLIP |
| TTK     | TTK protein kinase                                                           | miR-15a-5p, miR-15b-5p, miR-16-5p, miR-195-5p                        | PAR-CLIP  |
| RBX1    | ring-box 1                                                                   | miR-15a-5p, miR-15b-5p, miR-16-5p                                    | PAR-CLIP  |
| SKP2    | S-phase kinase associated protein 2                                          | miR-16-5p                                                            | HITS-CLIP |
| MYC     | MYC proto-oncogene                                                           | miR-16-5p                                                            | TRAP      |
|         |                                                                              | miR-103a-3p, miR-107, miR-195-5p                                     | Multiple  |
|         |                                                                              | miR-424-5p                                                           | PAR-CLIP  |
| ZBTB17  | zinc finger and BTB domain containing 17                                     | miR-103a-3p, miR-107                                                 | PAR-CLIP  |
| TP53    | tumor protein p53                                                            | miR-15a-5p, miR-16-5p, miR-103a-3p, miR-107                          | Multiple  |
| CHEK1   | checkpoint kinase 1                                                          | miR-15a-5p, miR-15b-5p, miR-16-5p, miR-424-5p                        | Multiple  |
| ANAPC13 | anaphase promoting complex subunit 13                                        | miR-15a-5p, miR-15b-5p, miR-16-5p, miR-195-5p, miR-424-5p            | Multiple  |
|         |                                                                              | miR-103a-3p, miR-107                                                 | PAR-CLIP  |
| GADD45A | growth arrest and DNA damage inducible gamma                                 | miR-103a-3p, miR-107                                                 | HITS-CLIP |
| BUB1    | BUB1 mitotic checkpoint serine/threonine kinase                              | miR-103a-3p, miR-107                                                 | Multiple  |
| BUB3    | BUB3 mitotic checkpoint serine/threonine kinase                              | miR-15a-5p, miR-15b-5p, miR-16-5p, miR-424-5p                        | PAR-CLIP  |
| PCNA    | proliferating cell nuclear antigen                                           | miR-424-5p                                                           | PAR-CLIP  |
| YWHAQ   | tyrosine 3-monooxygenase/tryptophan 5-monooxygenase activation protein theta | miR-15a-5p                                                           | PAR-CLIP  |
|         |                                                                              | miR-16-5p                                                            | HITS-CLIP |
|         |                                                                              | miR-424-5p                                                           | Multiple  |
| PLK1    | polo like kinase 1                                                           | miR-16-5p, miR-103a-3p, miR-107                                      | Multiple  |
|         |                                                                              | miR-424-5p                                                           | PAR-CLIP  |
| ABL1    | ABL proto-oncogene 1, non-receptor tyrosine kinase                           | miR-16-5p, miR-103a-3p, miR-107, miR-424-5p                          | Multiple  |
| WEE1    | WEE1 homolog                                                                 | miR-15a-5p, miR-15b-5p, miR-16-5p, miR-103a-3p, miR-107, miR-195-5p, | Multiple  |

|       |                                                |  |                                                         |           |
|-------|------------------------------------------------|--|---------------------------------------------------------|-----------|
| HDAC2 | histone deacetylase 2                          |  | miR-424-5p                                              |           |
| ORC6  | origin recognition complex subunit 6           |  | miR-16-5p                                               | HITS-CLIP |
| MCM3  | minichromosome maintenance complex component 3 |  | miR-15a-5p                                              | PAR-CLIP  |
|       |                                                |  | miR-103a-3p, miR-107                                    | Multiple  |
| MCM4  | minichromosome maintenance complex component 4 |  | miR-16-5p                                               | HITS-CLIP |
| MCM7  | minichromosome maintenance complex component 7 |  | miR-103a-3p, miR-107                                    | HITS-CLIP |
|       |                                                |  | miR-15a-5p                                              | PAR-CLIP  |
|       |                                                |  | miR-15b-5p, miR-16-5p, miR-103a-3p, miR-107, miR-424-5p | Multiple  |

---

HITS-CLIP: high-throughput sequencing of RNA isolated by crosslinking immunoprecipitation

PAR-CLIP: photoactivatable ribonucleoside-enhanced crosslinking and immunoprecipitation
