# Supplementary material for: Interpreting the MicroRNA-15/107 family: interaction identification by combining network based and experiment supported approach
Source: Springer Nature journal article supplement (doi:10.1186/s12881-019-0824-9), 2019-05-31
Supplement: MOESM5 [file 16763832]

Additional file 5. Previous literatures showing the implication of miR-15/107 family and cell cycle related biological events

| miRNAs      | Role in cell cycle related events                                                                                                                                                                        | References |
|-------------|----------------------------------------------------------------------------------------------------------------------------------------------------------------------------------------------------------|------------|
| miR-15a-5p  | Human miR-15a-5p inhibits pituitary tumor cell proliferation, invasion and migration by targeting Sox5.                                                                                                  | (1)        |
|             | miR-15a inhibits cell proliferation and epithelial to mesenchymal transition in pancreatic ductal adenocarcinoma by down-regulating Bmi-1 expression.                                                    | (2)        |
|             | Up-regulation of miR-15a-5p suppresses cell proliferation, migration and invasion of these ectopic stem cells by targeting the 3' untranslated region of VEGFA.                                          | (3)        |
|             | Increased miR-15a suppresses the Cyclin E1, regulated CDK2 and promotes the G <sub>1</sub> /S transition.                                                                                                | (4)        |
|             | Overexpression of VEGFA or inhibition of miR-15a-5p promotes cell proliferation in osteoarthritis chondrocytes.                                                                                          | (5)        |
|             | miR-15a-5p suppresses the proliferation, motility, invasiveness and angiogenic potential and increased apoptosis when combined with docetaxel in chemotherapy-resistant ovarian cancer.                  | (6)        |
|             | High levels of miR-15a-5p in the young poor ovarian response group represses granulosa cell proliferation by regulating the PI3K-AKT-mTOR signaling pathway and promoted apoptosis through BCL2 and BAD. | (7)        |
|             | miR-15a-5p suppresses endometrial cancer cell growth via Wnt/ $\beta$ -catenin signaling pathway by inhibiting WNT3A.                                                                                    | (8)        |
|             | Ectopic overexpression of miR-15a-5p suppresses cancer proliferation, induces cell cycle arrest in HepG2 or SNU-182 cells <i>in vitro</i> , and inhibits HCC tumor growth <i>in vivo</i> .               | (9)        |
| miR-16-5p   | MicroRNA-16-5p overexpression suppresses proliferation and invasion as well as triggers apoptosis by targeting VEGFA in breast carcinoma.                                                                | (10)       |
|             | Acute myeloid leukemia (AML) is associated with heterogeneous clonal proliferation, while numerous microRNAs are involved in AML and associated with the expression level of VEGF, including miR-16-5p.  | (11)       |
| miR-103a-3p | Overexpression of miR-103a-3p inhibits the proliferation                                                                                                                                                 | (12)       |

|         |                                                                                                                                                                                     |      |
|---------|-------------------------------------------------------------------------------------------------------------------------------------------------------------------------------------|------|
|         | and osteogenic differentiation of hADSCs (human adipose tissue-derived stromal cells), downregulates protein and mRNA levels of predicted target of miR-103a-3p (CDK6 and DICER1).  |      |
|         | Over-expression of circTCF25 could down-regulate miR-103a-3p and miR-107, increase CDK6 expression, and promote proliferation and migration <i>in vitro</i> and <i>in vivo</i> .    | (13) |
| miR-107 | MicroRNA-107 promotes proliferation of gastric cancer cells by targeting cyclin dependent kinase 8.                                                                                 | (14) |
|         | miR-107 promotes hepatocellular carcinoma cell proliferation by targeting Axin2.                                                                                                    | (15) |
|         | MicroRNA-107 inhibits tumor growth and metastasis by targeting the BDNF-mediated PI3K/AKT pathway in human non-small lung cancer.                                                   | (16) |
|         | Up-regulation of MicroRNA-107 induces proliferation in human gastric cancer cells by targeting the transcription factor FOXO1.                                                      | (17) |
|         | Up-regulation of miR-107 decreases proliferation rates, colony-forming abilities, tumorigenicity and increases apoptosis rates by targeting DKK-1.                                  | (18) |
|         | Treatment with miR-107 significantly blocks cell proliferation, DNA replication, colony formation, and invasion in SCC25 and CAL27 cells by targeting protein kinase C $\epsilon$ . | (19) |
|         | miR-107 directly targets MCL1 and activates ATR/Chk1 pathway to inhibit proliferation, migration and invasiveness of cervical cancer cells.                                         | (20) |
|         | miR-107 overexpression inhibits cell proliferation in human neuroblastoma and rat pituitary adenoma cells by targeting AIP.                                                         | (21) |
|         | Decreased miR-107 could inhibit tumor growth in a nude mouse model of triple-negative breast cancer.                                                                                | (22) |
|         | Overexpression of miR-107 in glioma cells leads to inhibition of HBMVEC proliferation, migration and tube formation ability.                                                        | (23) |
|         | MicroRNA-107 inhibits U87 glioma cell growth and invasion by target Notch2.                                                                                                         | (24) |
|         | miR-107 overexpression suppresses cell proliferation in                                                                                                                             | (25) |

|            |                                                                                                                                                                                                                                                 |      |
|------------|-------------------------------------------------------------------------------------------------------------------------------------------------------------------------------------------------------------------------------------------------|------|
|            | glioma cells, whereas miR-107 knockdown promotes cell growth in MO59K cell line.                                                                                                                                                                |      |
|            | P53-induced microRNA-107 inhibits proliferation of glioma cells and down-regulates the expression of CDK6 and Notch-2.                                                                                                                          | (26) |
|            | MiR-107 suppresses proliferation of hepatoma cells through targeting HMGA2 mRNA 3'UTR                                                                                                                                                           | (27) |
|            | miR-107 can simultaneously target large tumor suppressor 2 (LATS2) and synchronically modulate its expression, thereby promoting proliferation and invasion of GAC cells.                                                                       | (28) |
|            | miR-107 improves the proliferative and migratory ability of HepG2 cells.                                                                                                                                                                        | (29) |
|            | miR-107 mimic leads to a significant increase in the G <sub>0</sub> /G <sub>1</sub> population and a significant decrease in the G <sub>2</sub> /M population, and functions as a tumor suppressor in human esophageal squamous cell carcinoma. | (30) |
| miR-195-5p | Overexpression of miR-195-5p significantly suppresses renal cell carcinoma growth in vitro and in vivo by targeting REGγ.                                                                                                                       | (31) |
|            | Overexpression of miR-195-5p inhibits cell proliferation, reduces cell colony formation, suppresses cell migration and causes an accumulation of cells in the G <sub>1</sub> phase of the cell cycle by regulating CCNE1 in breast cancer.      | (32) |
|            | miR-195-5p suppresses the proliferation, migration, and invasion of oral squamous cell carcinoma by targeting TRIM14.                                                                                                                           | (33) |
|            | Overexpression of miR-195-5p in hepatoma cells reduces PHF19 expression, leads to suppression of hepatoma cell invasion, migration and proliferation in <i>vitro</i> .                                                                          | (34) |
|            | MicroRNA-195-5p suppresses glucose uptake and proliferation of human bladder cancer T24 cells by regulating GLUT3 expression.                                                                                                                   | (35) |
|            | MicroRNA-195-5p suppresses osteosarcoma cell proliferation and invasion by suppressing naked cuticle homolog 1.                                                                                                                                 | (36) |
|            | Anti-apoptosis endothelial cell-secreted microRNA-195-5p promotes pulmonary arterial smooth muscle cell proliferation and migration in pulmonary arterial hypertension.                                                                         | (37) |

|             |                                                                                                                                                                            |      |
|-------------|----------------------------------------------------------------------------------------------------------------------------------------------------------------------------|------|
| miR-424-5p  | miR-424-5p promotes proliferation of gastric cancer by targeting Smad3 through TGF- $\beta$ signaling pathway.                                                             | (38) |
|             | Downregulated miR-424-5p causes the overexpression of MEK1 and cyclin E1 in the psoriatic keratinocytes, resulting in the keratinocyte overgrowth and hyper-proliferation. | (39) |
|             | miR-424-5p mimics could decrease the invasion, metastasis and proliferation of esophageal squamous carcinom cells, while SMAD7 is a specific target gene for miR-424-5p.   | (40) |
|             | Ectopic expression of miR-424 promotes proliferation and invasion of gastric cancer cells by targeting LATS1 gene.                                                         | (41) |
|             | miR-424-5p plays its role as an anti-onco gene in cervical cancer cell growth by targeting KDM5B via the Notch signaling pathway.                                          | (42) |
|             | miR-424-5p increases proliferation, migration and invasion of pancreatic cancer cells, while inhibits cell apoptosis.                                                      | (43) |
|             | miR-424-5p could prevent the proliferation, migration, and invasion in NSCLC cells.                                                                                        | (44) |
| miR-497-5p  | miR-497-5p inhibits cell proliferation and invasion by targeting KCa3.1 in angiosarcoma.                                                                                   | (45) |
| miR-503-5p  | miR-503-3p (the passenger strand of miR-503-5p) inhibits cell proliferation in lung cancer.                                                                                | (46) |
| miR-646     | miR-646 negatively regulates NOB1 and inhibits the proliferation and migration of renal cancer cells.                                                                      | (47) |
|             | miR-646 inhibits cell proliferation by targeting FOXX1 in gastric cancer.                                                                                                  | (48) |
|             | Overexpression of miR-646 inhibits cell proliferation and metastasis in lung cancer.                                                                                       | (49) |
|             | Overexpression of miR-646 inhibits cell proliferation, migration, and invasion in osteosarcoma cells.                                                                      | (50) |
| miR-6838-5p | None                                                                                                                                                                       | -    |

### References:

1. Renjie W, Haiqian L. MiR-132, miR-15a and miR-16 synergistically inhibit pituitary tumor cell proliferation, invasion and migration by targeting Sox5. *Cancer letters*. 2015;356(2):568-78.
2. Guo S, Xu X, Tang Y, Zhang C, Li J, Ouyang Y, et al. miR-15a inhibits cell proliferation and epithelial to mesenchymal transition in pancreatic ductal adenocarcinoma by down-regulating Bmi-1 expression. *Cancer letters*. 2014 Mar 1;344(1):40-6.
3. Liu XJ, Bai XG, Teng YL, Song L, Lu N, Yang RQ. miRNA-15a-5p regulates VEGFA in endometrial mesenchymal stem cells and contributes to the pathogenesis of endometriosis. *European review for*

medical and pharmacological sciences. 2016 Aug;20(16):3319-26.

4. Alderman C, Yang Y. The anti-melanoma activity and oncogenic targets of hsa-miR-15a-5p. *RNA & disease*. 2016;3(4).
5. Chen H, Tian Y. MiR-15a-5p regulates viability and matrix degradation of human osteoarthritis chondrocytes via targeting VEGFA. *Bioscience trends*. 2017 Jan 16;10(6):482-8.
6. Rodriguez-Aguayo C, Monroig PDC, Redis RS, Bayraktar E, Almeida MI, Ivan C, et al. Regulation of hnRNPA1 by microRNAs controls the miR-18a-K-RAS axis in chemotherapy-resistant ovarian cancer. *Cell discovery*. 2017;3:17029.
7. Zhang K, Zhong W, Li WP, Chen ZJ, Zhang C. miR-15a-5p levels correlate with poor ovarian response in human follicular fluid. *Reproduction*. 2017 Oct;154(4):483-96.
8. Wang ZM, Wan XH, Sang GY, Zhao JD, Zhu QY, Wang DM. miR-15a-5p suppresses endometrial cancer cell growth via Wnt/beta-catenin signaling pathway by inhibiting WNT3A. *European review for medical and pharmacological sciences*. 2017 Nov;21(21):4810-8.
9. Long J, Jiang C, Liu B, Fang S, Kuang M. MicroRNA-15a-5p suppresses cancer proliferation and division in human hepatocellular carcinoma by targeting BDNF. *Tumour Biol*. 2016 May;37(5):5821-8.
10. Qu Y, Liu H, Lv X, Liu Y, Wang X, Zhang M, et al. MicroRNA-16-5p overexpression suppresses proliferation and invasion as well as triggers apoptosis by targeting VEGFA expression in breast carcinoma. *Oncotarget*. 2017 Sep 22;8(42):72400-10.
11. Li L, Zhu L, Wang Y, Zhou, Zhu J, Xie W, et al. Profiling of microRNAs in AML cells following overexpression or silencing of the VEGF gene. *Oncology letters*. 2017 Jan;13(1):105-10.
12. Kim DS, Lee SY, Lee JH, Bae YC, Jung JS. MicroRNA-103a-3p controls proliferation and osteogenic differentiation of human adipose tissue-derived stromal cells. *Experimental & molecular medicine*. 2015 Jul 10;47:e172.
13. Zhong Z, Lv M, Chen J. Screening differential circular RNA expression profiles reveals the regulatory role of circTCF25-miR-103a-3p/miR-107-CDK6 pathway in bladder carcinoma. *Scientific reports*. 2016 Aug 3;6:30919.
14. Song YQ, Ma XH, Ma GL, Lin B, Liu C, Deng QJ, et al. MicroRNA-107 promotes proliferation of gastric cancer cells by targeting cyclin dependent kinase 8. *Diagnostic pathology*. 2014 Aug 28;9:164.
15. Zhang JJ, Wang CY, Hua L, Yao KH, Chen JT, Hu JH. miR-107 promotes hepatocellular carcinoma cell proliferation by targeting Axin2. *International journal of clinical and experimental pathology*. 2015;8(5):5168-74.
16. Xia H, Li Y, Lv X. MicroRNA-107 inhibits tumor growth and metastasis by targeting the BDNF-mediated PI3K/AKT pathway in human non-small lung cancer. *International journal of oncology*. 2016 Oct;49(4):1325-33.
17. Li F, Liu B, Gao Y, Liu Y, Xu Y, Tong W, et al. Upregulation of microRNA-107 induces proliferation in human gastric cancer cells by targeting the transcription factor FOXO1. *FEBS letters*. 2014 Feb 14;588(4):538-44.
18. Zhang ZC, Liu JX, Shao ZW, Pu FF, Wang BC, Wu Q, et al. In vitro effect of microRNA-107 targeting Dkk-1 by regulation of Wnt/beta-catenin signaling pathway in osteosarcoma. *Medicine*. 2017 Jul;96(27):e7245.
19. Datta J, Smith A, Lang JC, Islam M, Dutt D, Teknos TN, et al. microRNA-107 functions as a candidate tumor-suppressor gene in head and neck squamous cell carcinoma by downregulation of protein kinase C $\epsilon$ . *Oncogene*. 2012 Sep 6;31(36):4045-53.
20. Zhou C, Li G, Zhou J, Han N, Liu Z, Yin J. miR-107 activates ATR/Chk1 pathway and suppress

cervical cancer invasion by targeting MCL1. *PloS one*. 2014;9(11):e111860.

21. Trivellin G, Butz H, Delhove J, Igreja S, Chahal HS, Zivkovic V, et al. MicroRNA miR-107 is overexpressed in pituitary adenomas and inhibits the expression of aryl hydrocarbon receptor-interacting protein in vitro. *American journal of physiology Endocrinology and metabolism*. 2012 Sep 15;303(6):E708-19.

22. Zhang L, Ma P, Sun LM, Han YC, Li BL, Mi XY, et al. MiR-107 down-regulates SIAH1 expression in human breast cancer cells and silencing of miR-107 inhibits tumor growth in a nude mouse model of triple-negative breast cancer. *Mol Carcinog*. 2016 May;55(5):768-77.

23. Chen L, Li ZY, Xu SY, Zhang XJ, Zhang Y, Luo K, et al. Upregulation of miR-107 Inhibits Glioma Angiogenesis and VEGF Expression. *Cell Mol Neurobiol*. 2016 Jan;36(1):113-20.

24. Chen L, Chen XR, Chen FF, Liu Y, Li P, Zhang R, et al. MicroRNA-107 inhibits U87 glioma stem cells growth and invasion. *Cell Mol Neurobiol*. 2013 Jul;33(5):651-7.

25. He J, Zhang W, Zhou Q, Zhao T, Song Y, Chai L, et al. Low-expression of microRNA-107 inhibits cell apoptosis in glioma by upregulation of SALL4. *The international journal of biochemistry & cell biology*. 2013 Sep;45(9):1962-73.

26. Chen L, Zhang R, Li P, Liu Y, Qin K, Fa ZQ, et al. P53-induced microRNA-107 inhibits proliferation of glioma cells and down-regulates the expression of CDK6 and Notch-2. *Neurosci Lett*. 2013 Feb 8;534:327-32.

27. Wang Y, Chen F, Zhao M, Yang Z, Zhang S, Ye L, et al. MiR-107 suppresses proliferation of hepatoma cells through targeting HMGA2 mRNA 3'UTR. *Biochemical and biophysical research communications*. 2016 Nov 18;480(3):455-60.

28. Zhang M, Wang X, Li W, Cui Y. miR-107 and miR-25 simultaneously target LATS2 and regulate proliferation and invasion of gastric adenocarcinoma (GAC) cells. *Biochemical and biophysical research communications*. 2015 May 8;460(3):806-12.

29. Zou C, Zou C, Cheng W, Li Q, Han Z, Wang X, et al. Heme oxygenase-1 retards hepatocellular carcinoma progression through the microRNA pathway. *Oncology reports*. 2016 Nov;36(5):2715-22.

30. Sharma P, Saini N, Sharma R. miR-107 functions as a tumor suppressor in human esophageal squamous cell carcinoma and targets Cdc42. *Oncology reports*. 2017 May;37(5):3116-27.

31. Chen S, Wang L, Yao X, Chen H, Xu C, Tong L, et al. miR-195-5p is critical in REGgamma-mediated regulation of wnt/beta-catenin pathway in renal cell carcinoma. *Oncotarget*. 2017 Sep 8;8(38):63986-4000.

32. Luo Q, Wei C, Li X, Li J, Chen L, Huang Y, et al. MicroRNA-195-5p is a potential diagnostic and therapeutic target for breast cancer. *Oncology reports*. 2014 Mar;31(3):1096-102.

33. Wang T, Ren Y, Liu R, Ma J, Shi Y, Zhang L, et al. miR-195-5p Suppresses the Proliferation, Migration, and Invasion of Oral Squamous Cell Carcinoma by Targeting TRIM14. *BioMed research international*. 2017;2017:7378148.

34. Xu H, Hu YW, Zhao JY, Hu XM, Li SF, Wang YC, et al. MicroRNA-195-5p acts as an anti-oncogene by targeting PHF19 in hepatocellular carcinoma. *Oncology reports*. 2015 Jul;34(1):175-82.

35. Fei X, Qi M, Wu B, Song Y, Wang Y, Li T. MicroRNA-195-5p suppresses glucose uptake and proliferation of human bladder cancer T24 cells by regulating GLUT3 expression. *FEBS letters*. 2012 Feb 17;586(4):392-7.

36. Qu Q, Chu X, Wang P. MicroRNA-195-5p suppresses osteosarcoma cell proliferation and invasion by suppressing naked cuticle homolog 1. *Cell Biol Int*. 2017 Mar;41(3):287-95.

37. Zeng Z, Yao J, Li Y, Xue Y, Zou Y, Shu Z, et al. Anti-apoptosis endothelial cell-secreted

microRNA-195-5p promotes pulmonary arterial smooth muscle cell proliferation and migration in pulmonary arterial hypertension. *Journal of cellular biochemistry*. 2017 Sep 1.

38. Wei S, Li Q, Li Z, Wang L, Zhang L, Xu Z. miR-424-5p promotes proliferation of gastric cancer by targeting Smad3 through TGF-beta signaling pathway. *Oncotarget*. 2016 Nov 15;7(46):75185-96.

39. Jinnin M. Recent progress in studies of miRNA and skin diseases. *The Journal of dermatology*. 2015 Jun;42(6):551-8.

40. Wang F, Wang J, Yang X, Chen D, Wang L. MiR-424-5p participates in esophageal squamous cell carcinoma invasion and metastasis via SMAD7 pathway mediated EMT. *Diagnostic pathology*. 2016 Sep 15;11(1):88.

41. Zhang J, Liu H, Hou L, Wang G, Zhang R, Huang Y, et al. Circular RNA\_LARP4 inhibits cell proliferation and invasion of gastric cancer by sponging miR-424-5p and regulating LATS1 expression. *Molecular cancer*. 2017 Sep 11;16(1):151.

42. Zhou Y, An Q, Guo RX, Qiao YH, Li LX, Zhang XY, et al. miR424-5p functions as an anti-oncogene in cervical cancer cell growth by targeting KDM5B via the Notch signaling pathway. *Life Sci*. 2017 Feb 15;171:9-15.

43. Wu K, Hu G, He X, Zhou P, Li J, He B, et al. MicroRNA-424-5p suppresses the expression of SOCS6 in pancreatic cancer. *Pathol Oncol Res*. 2013 Oct;19(4):739-48.

44. Zhang M, Zeng J, Zhao Z, Liu Z. Loss of MiR-424-3p, not miR-424-5p, confers chemoresistance through targeting YAP1 in non-small cell lung cancer. *Mol Carcinog*. 2017 Mar;56(3):821-32.

45. Chen Y, Kuang D, Zhao X, Chen D, Wang X, Yang Q, et al. miR-497-5p inhibits cell proliferation and invasion by targeting KCa3.1 in angiosarcoma. *Oncotarget*. 2016 Sep 6;7(36):58148-61.

46. Sun Y, Li L, Xing S, Pan Y, Shi Y, Zhang L, et al. miR-503-3p induces apoptosis of lung cancer cells by regulating p21 and CDK4 expression. *Cancer Biomark*. 2017 Dec 6;20(4):597-608.

47. Li W, Liu M, Feng Y, Xu YF, Huang YF, Che JP, et al. Downregulated miR-646 in clear cell renal carcinoma correlated with tumour metastasis by targeting the nin one binding protein (NOB1). *British journal of cancer*. 2014 Sep 9;111(6):1188-200.

48. Zhang P, Tang WM, Zhang H, Li YQ, Peng Y, Wang J, et al. MiR-646 inhibited cell proliferation and EMT-induced metastasis by targeting FOXP1 in gastric cancer. *British journal of cancer*. 2017 Aug 8;117(4):525-34.

49. Pan Y, Chen Y, Ma D, Ji Z, Cao F, Chen Z, et al. miR-646 is a key negative regulator of EGFR pathway in lung cancer. *Experimental lung research*. 2016 Aug;42(6):286-95.

50. Sun XH, Geng XL, Zhang J, Zhang C. miRNA-646 suppresses osteosarcoma cell metastasis by downregulating fibroblast growth factor 2 (FGF2). *Tumour Biol*. 2015 Mar;36(3):2127-34.
